# Supplementary material
Source: publisher figshare collection journal article supplement (https://tandf.figshare.com/ndownloader/files/12931211)
Supplement: Supplementary file 1 [file 12931211]

Supplemental Table 1.

Tag7-Mts1 complex stimulates migration of CD4+, CD8+ and CD16+CD56+ (NK) cells.

|  | CD14 | | CD16 CD56 | | CD8 | | CD4 | | CD16CD56* | | CD15* | |
| --- | --- | --- | --- | --- | --- | --- | --- | --- | --- | --- | --- | --- |
| 103 cells | % of 1 line. | 103 cells | % of 1 line. | 103 cells | % of 1 line. | 103 cells | % of 1 line. | 103 cells | % of 1 line. | 103 cells | % of 1 line. |
| 1. | 120 |  | 0.9 |  | 113 |  | 130 |  | 500 |  | 500 |  |
| 2. | 11 | 9 | 0.32 | 36 | 8.3 | 7.3 | 5 | 3.8 | 55 | 11 | 65 | 13 |
| 3. | 7.6 | 6 | 0.95 | 100 | 21 | 18.6 | 12 | 9.2 | 400 | 80 | 55 | 11 |

Lymphocytes of healthy donors were applied in upper chambers of modified Beuden camera, in the lower chambers were applied: 2- RPMI medium, 3- Tag7-Mts1 complex (5х10-8М, Mts1/Tag7=2). Cells migration was measured after 4 hours of incubation. Number of CD14+, CD16+ CD56+, CD8+, CD4+ cells in lower and upper chamber was calculated with use of flow cytometry. *- in upper chamber were applied purified CD16CD56 (NK), or CD15 cells (neutrophils).
